# Supplementary material for: Effects of 1,25-Dihydroxyvitamin D3 on the Inflammatory Responses of Stromal Vascular Cells and Adipocytes from Lean and Obese Mice
Source: PubMed Central journal article supplement (PMC7071143; doi:10.3390/nu12020364), 2020-01-30
Supplement: nutrients-12-00364-s001.pdf [file nutrients-12-00364-s001.pdf]

## Supplementary Files

**Table S1. Composition of the experimental diets (2)**

|                                       | CON (10% kcal fat)             |                                   | HFD (45% kcal fat)             |                                   |
|---------------------------------------|--------------------------------|-----------------------------------|--------------------------------|-----------------------------------|
|                                       | DC<br>(1,000 IU/kg<br>of diet) | 10DS<br>(10,000 IU/kg<br>of diet) | DC<br>(1,000 IU/kg of<br>diet) | 10DS<br>(10,000 IU/kg<br>of diet) |
| Casein, 30 Mesh                       | 200                            | 200                               | 200                            | 200                               |
| L-Cystine                             | 3                              | 3                                 | 3                              | 3                                 |
| Corn Starch                           | 452.2                          | 452.2                             | 72.8                           | 72.8                              |
| Maltodextrin 10                       | 75                             | 75                                | 100                            | 100                               |
| Sucrose                               | 172.8                          | 172.8                             | 172.8                          | 172.8                             |
| Cellulose, BW200                      | 50                             | 50                                | 50                             | 50                                |
| Soybean Oil                           | 25                             | 25                                | 25                             | 25                                |
| Lard                                  | 20                             | 20                                | 177.5                          | 177.5                             |
| Mineral Mix <sup>1</sup>              | 10                             | 10                                | 10                             | 10                                |
| DiCalcium Phosphate                   | 13                             | 13                                | 13                             | 13                                |
| Calcium Carbonate                     | 5.5                            | 5.5                               | 5.5                            | 5.5                               |
| Potassium Citrate, 1 H <sub>2</sub> O | 16.5                           | 16.5                              | 16.5                           | 16.5                              |
| Vitamin Mix <sup>2</sup>              | 10                             | 0                                 | 10                             | 0                                 |
| Vitamin Mix<br>(No vitD)              | 0                              | 10                                | 0                              | 10                                |
| Vitamin D3<br>(100,000IU/g)           | 0                              | 0.09                              | 0                              | 0.09                              |
| Choline Bitartrate                    | 2                              | 2                                 | 2                              | 2                                 |
| FD&C Yellow Dye #5                    | 0.04                           | 0                                 | 0                              | 0.025                             |
| FD&C Red Dye #40                      | 0.01                           | 0                                 | 0.05                           | 0                                 |
| FD&C Blue Dye #1                      |                                | 0.05                              | 0                              | 0.025                             |
| Total                                 | 1,055.05                       | 1,055.14                          | 858.15                         | 858.24                            |
| kcal/g diet                           | 3.85                           | 3.84                              | 4.73                           | 4.73                              |

Resource: Research Diets Inc., New Brunswick, NJ, USA

<sup>1</sup> 10 g of Mineral Mix (Research Diets Inc., #S10026) provides 1.0 g of Na, 1.6 g of Cl, 0.5 g of Mg, 0.33 g of S, 59 mg of Mn, 37 mg of Fe, 29 mg of Zn, 6.0 mg of Cu, 2.0 mg of Cr, 1.6 mg of Mo, 0.16 mg of Se, 0.9 mg of Fl, 0.2 mg of I, and 3.99 g of sucrose.

<sup>2</sup> 10 g of Vitamin Mix (Research Diets Inc., #V10001) provides 4000 IU of vitamin A, 1000 IU of vitamin D<sub>3</sub>, 50 IU of vitamin E, 0.5 mg of menadione, 0.2 mg of biotin, 10 µg of vitamin B<sub>12</sub>, 2 mg of folic acid, 30 mg of niacin, 16 mg of pantothenic acid, 7 mg of vitamin B<sub>6</sub>, 6 mg of vitamin B<sub>2</sub>, 6 mg of vitamin B<sub>1</sub>, and 9.78 g of sucrose.

**Table S2. Composition of the experimental diets (3)**

|                                       | Control diet (g), CON<br>(10% kcal Fat) | High fat diet (g), HFD<br>(60% kcal Fat) |
|---------------------------------------|-----------------------------------------|------------------------------------------|
| Casein, 30 Mesh                       | 200                                     | 200                                      |
| L-Cystine                             | 3                                       | 3                                        |
| Corn Starch                           | 315                                     | 72.8                                     |
| Maltodextrin 10                       | 35                                      | 125                                      |
| Sucrose                               | 350                                     | 68.8                                     |
| Cellulose, BW200                      | 50                                      | 50                                       |
| Soybean Oil                           | 25                                      | 25                                       |
| Lard                                  | 20                                      | 245                                      |
| Mineral Mix <sup>1</sup>              | 10                                      | 10                                       |
| DiCalcium Phosphate                   | 13                                      | 13                                       |
| Calcium Carbonate                     | 5.5                                     | 5.5                                      |
| Potassium Citrate, 1 H <sub>2</sub> O | 16.5                                    | 16.5                                     |
| Vitamin Mix <sup>2</sup>              | 10                                      | 10                                       |
| Choline Bitartrate                    | 2                                       | 2                                        |
| FD&C Yellow Dye #5                    | 0.05                                    | 0                                        |
| FD&C Red Dye #40                      | 0                                       | 0.05                                     |
| Total                                 | 1,055.05                                | 773.85                                   |
| kcal/g diet                           | 3.85                                    | 5.24                                     |

Resource: Research Diets Inc., New Brunswick, NJ, USA

<sup>1</sup> 10 g of Mineral Mix (Research Diets Inc., #S10026) provides 1.0 g of Na, 1.6 g of Cl, 0.5 g of Mg, 0.33 g of S, 59 mg of Mn, 37 mg of Fe, 29 mg of Zn, 6.0 mg of Cu, 2.0 mg of Cr, 1.6 mg of Mo, 0.16 mg of Se, 0.9 mg of Fl, 0.2 mg of I, and 3.99 g of sucrose.

<sup>2</sup> 10 g of Vitamin Mix (Research Diets Inc., #V10001) provides 4000 IU of vitamin A, 1000 IU of vitamin D<sub>3</sub>, 50 IU of vitamin E, 0.5 mg of menadione, 0.2 mg of biotin, 10 µg of vitamin B<sub>12</sub>, 2 mg of folic acid, 30 mg of niacin, 16 mg of pantothenic acid, 7 mg of vitamin B<sub>6</sub>, 6 mg of vitamin B<sub>2</sub>, 6 mg of vitamin B<sub>1</sub>, and 9.78 g of sucrose.

**Table S3. Body weight, weight gain, body fat, food intake, and serum 25(OH)D level of mice in the CON-DC, CON-10DS, HFD-DC and HFD-10DS groups<sup>1,2</sup>**

|                                              | CON                      |                          | HFD                      |                          | P-value    |                      |             |
|----------------------------------------------|--------------------------|--------------------------|--------------------------|--------------------------|------------|----------------------|-------------|
|                                              | DC<br>(n=8)              | 10DS<br>(n=8)            | DC<br>(n=8)              | 10DS<br>(n=8)            | Fat amount | Vitamin D<br>content | Interaction |
| Body wt. at 0 week (g)                       | 18.6 ± 1.5               | 18.8 ± 1.2               | 18.6 ± 1.2               | 18.5 ± 0.9               | 0.80       | 0.94                 | 0.65        |
| Body wt. at 13 week (g)                      | 30.1 ± 2.0 <sup>a</sup>  | 29.2 ± 2.6 <sup>a</sup>  | 40.2 ± 4.0 <sup>b</sup>  | 40.7 ± 3.5 <sup>b</sup>  | < 0.001    | 0.84                 | 0.57        |
| Weight gain (g)                              | 11.5 ± 1.5 <sup>a</sup>  | 10.4 ± 2.4 <sup>a</sup>  | 22.0 ± 2.8 <sup>b</sup>  | 22.5 ± 3.3 <sup>b</sup>  | < 0.001    | 0.73                 | 0.38        |
| White adipose tissue<br>wt. <sup>3</sup> (g) | 1.89 ± 0.46 <sup>a</sup> | 1.76 ± 0.60 <sup>a</sup> | 5.21 ± 0.80 <sup>b</sup> | 5.28 ± 0.77 <sup>b</sup> | < 0.001    | 0.91                 | 0.68        |
| Average food intake<br>(g/day)               | 2.74 ± 0.11 <sup>c</sup> | 2.65 ± 0.06 <sup>b</sup> | 2.54 ± 0.04 <sup>a</sup> | 2.65 ± 0.07 <sup>b</sup> | 0.001      | 0.56                 | 0.001       |
| Serum 25(OH)D (ng/mL)                        | 37.1 ± 4.8 <sup>a</sup>  | 93.9 ± 8.2 <sup>c</sup>  | 34.5 ± 3.2 <sup>a</sup>  | 83.4 ± 6.6 <sup>b</sup>  | 0.005      | < 0.001              | 0.07        |

<sup>1</sup>Two-way ANOVA was used to determine the significant effects of fat and vitamin D contents, and an interaction. <sup>ab</sup>Different superscripts indicate significant difference ( $P < 0.05$ ) by Duncan's multiple range test. The data are presented as means ± SEM.

<sup>2</sup>CON: 10% kcal fat diet; HFD: 45% kcal fat diet; DC: 1,000 IU vitamin D/kg diet; 10DS: 10,000 IU vitamin D/kg diet.

<sup>3</sup>White adipose tissue weight included epididymal, subcutaneous, retroperitoneum, and perinephric fat.

**Table S4. Body weight, weight gain, body fat, and food intake of mice in the CON and HFD groups**

|                                  | CON (n = 9) | HFD (n = 10) | <i>P</i> value <sup>2</sup> |
|----------------------------------|-------------|--------------|-----------------------------|
| Body weight at 0 week (g)        | 19.8 ± 0.3  | 19.9 ± 1.1   | 0.89                        |
| Body weight at 11 week (g)       | 30.9 ± 0.6  | 42.7 ± 1.2   | < 0.001                     |
| WAT weight <sup>2</sup> (g)      | 2.48 ± 0.12 | 5.55 ± 0.21  | < 0.001                     |
| Average food intake (g/day)      | 2.68 ± 0.04 | 2.33 ± 0.04  | < 0.001                     |
| Average energy intake (kcal/day) | 10.3 ± 0.2  | 12.2 ± 0.2   | < 0.001                     |

<sup>1</sup> The data are presented as means ± SEM, Student's *t* test was used to determine the significant effect of obesity (*P* < 0.05). CON: 10% kcal fat diet; HFD: 60% kcal fat diet.

<sup>2</sup> WAT includes perirenal, intraperitoneal, epididymal, and subcutaneous fat.

**Table S5. Visceral fat tissue weight (g) and total cell numbers of stromal vascular cell(SVC)s, CD45+ cells, macrophages, NK cells, B cells, CD4+ T cells, and CD8 T cells in visceral adipose tissue<sup>1,2</sup>**

|                                       | CON                          |                              | HFD                            |                                | P-value       |                     |             |
|---------------------------------------|------------------------------|------------------------------|--------------------------------|--------------------------------|---------------|---------------------|-------------|
|                                       | DC<br>(n=5)                  | 10DS<br>(n=5)                | DC<br>(n=6)                    | 10DS<br>(n=6)                  | Fat<br>amount | VitaminD<br>content | Interaction |
| Visceral fat weights <sup>3</sup> (g) | 0.97 ± 0.09 <sup>a</sup>     | 0.86 ± 0.15 <sup>a</sup>     | 2.02 ± 0.01 <sup>b</sup>       | 2.01 ± 0.01 <sup>b</sup>       | < 0.001       | 0.49                | 0.55        |
| SVCs                                  | 558,650±126,680 <sup>a</sup> | 386,800±122,341 <sup>a</sup> | 2,093,625±277,413 <sup>b</sup> | 1,845,208±435,608 <sup>b</sup> | < 0.001       | 0.49                | 0.90        |
| CD45+ cell                            | 321,313±100,559 <sup>a</sup> | 141,760±43,440 <sup>a</sup>  | 1,057,855±176,466 <sup>b</sup> | 874,074±231,035 <sup>b</sup>   | < 0.001       | 0.29                | 0.99        |
| Macrophage                            | 93,574±20,182 <sup>a</sup>   | 63,969±20,780 <sup>a</sup>   | 686,589±149,729 <sup>b</sup>   | 534,077 ±141,837 <sup>b</sup>  | < 0.001       | 0.44                | 0.60        |
| NK cell                               | 9,042±1,557 <sup>a</sup>     | 5,656±1,787 <sup>a</sup>     | 53,078±9,462 <sup>b</sup>      | 37,213±10,061 <sup>bc</sup>    | < 0.001       | 0.91                | 0.68        |
| B cell                                | 76,498±46,504                | 15,064±3,908                 | 42,188±4,978                   | 31,227±8,314                   | 0.68          | 0.11                | 0.26        |
| CD4 T cell                            | 44,110±12,968 <sup>ab</sup>  | 19,166±6,766 <sup>a</sup>    | 102,932±12,000 <sup>c</sup>    | 78,041±18,561 <sup>b</sup>     | 0.001         | 0.09                | 0.99        |
| CD8 T cell                            | 25,505±14,113                | 4,663±1,888                  | 47,306±15,476                  | 57,154 ±23,131                 | 0.04          | 0.75                | 0.37        |

<sup>1</sup>Two-way ANOVA was used to determine the significant effects of fat and vitamin D contents, and an interaction. <sup>ab</sup>Different superscripts indicate significant difference ( $P < 0.05$ ) by Duncan's multiple range test. The data are presented as means ± SEM.

<sup>2</sup>CON: 10% kcal fat diet; HFD: 45% kcal fat diet; DC: 1,000 IU vitamin D/kg diet; 10DS: 10,000 IU vitamin D/kg diet.

<sup>3</sup>Visceral fat includes perirenal, intraperitoneal, epididymal fat.

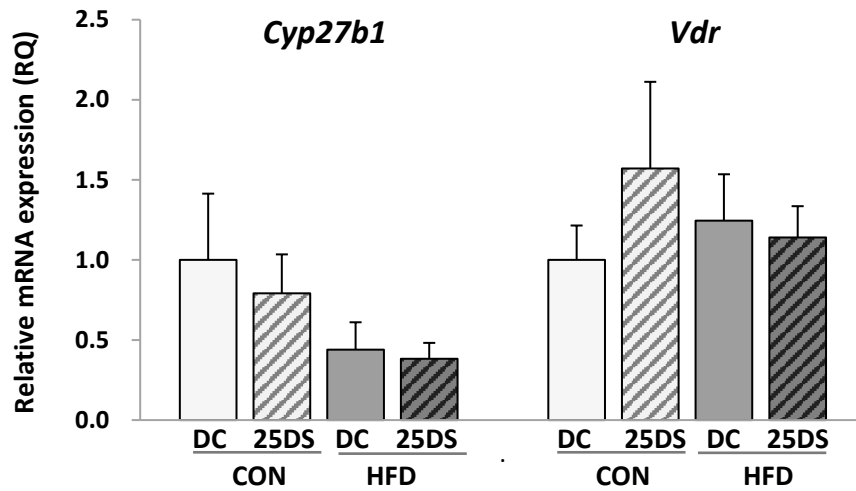

<P value>

|                   |      |      |
|-------------------|------|------|
| Fat amount        | 0.14 | 0.76 |
| Vitamin D content | 0.31 | 0.45 |
| Interaction       | 0.43 | 0.28 |

**Figure S1. The mRNA levels of *Cyp27b1* and *Vdr* in epididymal adipose tissue**

Data are presented as mean  $\pm$  SEM, n = 6~8 for each group. Two-way ANOVA was used to determine the significant effects of fat and vitamin D contents, and an interaction. CON: 10% kcal fat diet; HFD: 45% kcal fat diet; DC: 1,000 IU vitamin D/kg diet; 25DS: 25,000 IU vitamin D/kg diet.

*Cyp27b1*, cytochrome P450 27B1; *Vdr*, vitamin D receptor.

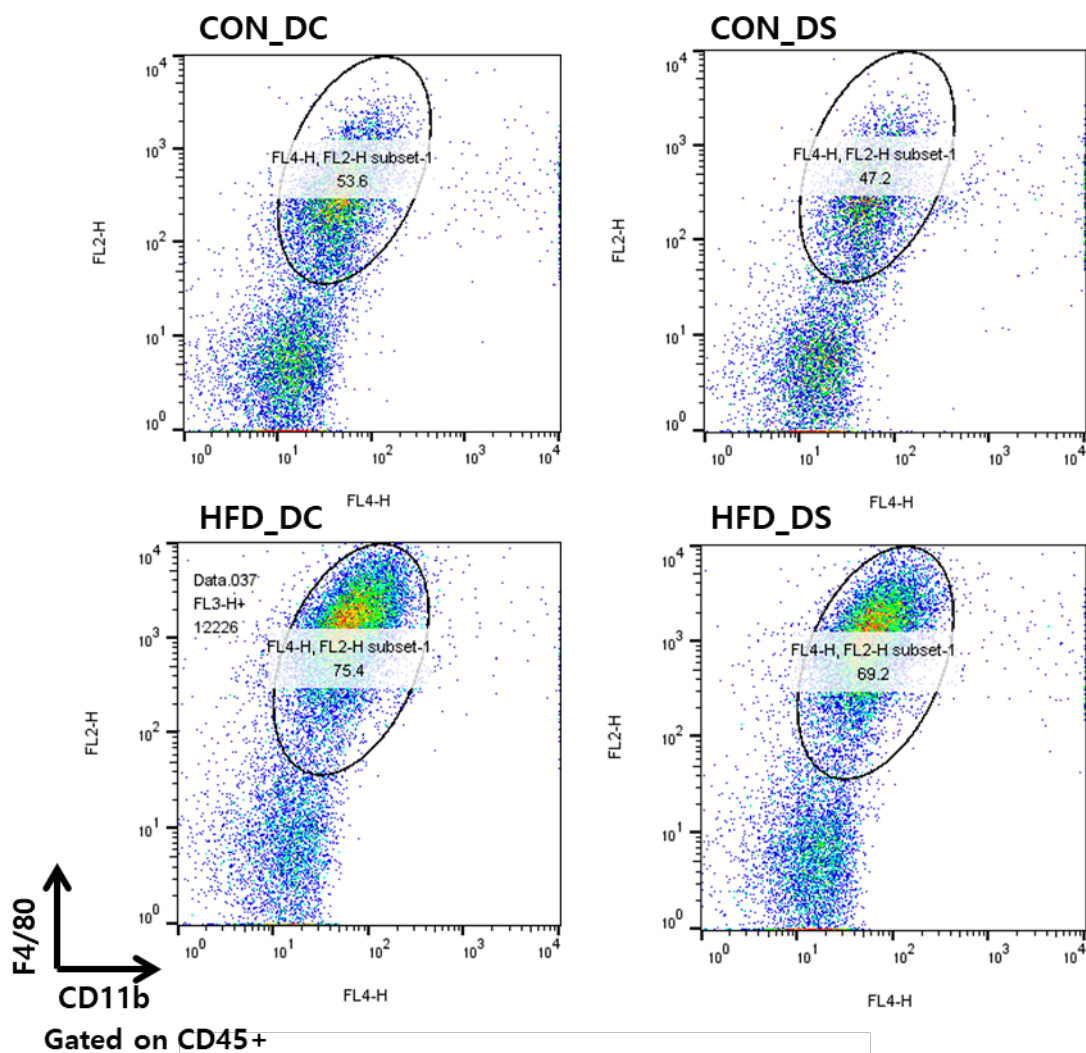

**Figure S2. Flow cytometric dot plots of macrophage from visceral adipose tissue**

CD45<sup>+</sup>F4/80<sup>+</sup> CD11b<sup>+</sup> cells were presented as dot plots of the FlowJo analyses. CON: 10% kcal fat diet; HFD: 45% kcal fat diet; DC: 1,000 IU vitamin D/kg diet; 10DS: 10,000 IU vitamin D/kg diet.
